# Supplementary material
Source: PubMed Central journal article supplement (PMC7881915)
Supplement: 11596_2021_2313_MOESM1_ESM.pdf [file 11596_2021_2313_MOESM1_ESM.pdf]

**Table S1 General characteristics of patients with COVID-19 after propensity score match (1:1 matched and 1:2 matched) in corticosteroids treatment and non-corticosteroids treatment groups**

| Characteristics                                             | 1:1 matched        |                                   |                                       | 1:2 matched       |                                   |                                       | P value |
|-------------------------------------------------------------|--------------------|-----------------------------------|---------------------------------------|-------------------|-----------------------------------|---------------------------------------|---------|
|                                                             | Total (n=400)      | Corticosteroids treatment (n=200) | Non-corticosteroids treatment (n=200) | Total (n=357)     | Corticosteroids treatment (n=119) | Non-corticosteroids treatment (n=238) |         |
| Age, years                                                  | 61 (48–69)         | 62 (47–71)                        | 61 (50–67)                            | 61 (50–68)        | 59 (45–68)                        | 61 (51–68)                            | 0.154   |
| Sex                                                         |                    |                                   |                                       |                   |                                   |                                       | 0.133   |
| Female                                                      | 198 (49.5%)        | 101 (50.5%)                       | 97 (48.5%)                            | 193 (54%)         | 71 (59.7%)                        | 122 (51.3%)                           |         |
| Male                                                        | 202 (50.5%)        | 99 (49.5%)                        | 103 (51.5%)                           | 164 (45.9%)       | 48 (40.3%)                        | 116 (48.7%)                           |         |
| <b>Symptoms on admission</b>                                |                    |                                   |                                       |                   |                                   |                                       |         |
| Cough                                                       | 272 (68%)          | 139 (69.5%)                       | 133 (66.5%)                           | 234 (65.5%)       | 83 (69.7%)                        | 151 (63.4%)                           | 0.237   |
| Sputum                                                      | 115 (28.8)         | 62 (31%)                          | 53 (26.5%)                            | 98 (27.5%)        | 31 (26.1%)                        | 67 (28.2%)                            | 0.675   |
| Dyspnea                                                     | 143 (35.8%)        | 75 (37.5%)                        | 68 (34%)                              | 124 (34.7%)       | 41 (34.5%)                        | 83 (34.9%)                            | 0.937   |
| Fatigue                                                     | 207 (51.8%)        | 96 (48%)                          | 111 (55.5%)                           | 174 (48.7%)       | 56 (47.1%)                        | 118 (49.6%)                           | 0.653   |
| Fever                                                       | 322 (80.5%)        | 164 (82%)                         | 158 (79%)                             | 281 (78.7%)       | 99 (83.2%)                        | 182 (76.5%)                           | 0.144   |
| <b>Laboratory findings</b>                                  |                    |                                   |                                       |                   |                                   |                                       |         |
| NLR                                                         | 3.65 (2.29–6.38)   | 3.91 (2.62–6.74)                  | 3.33 (2.15–6.17)                      | 3.01 (2.04–4.65)  | 3.20 (2.24–4.99)                  | 2.84 (1.92–4.60)                      | 0.062   |
| Platelet ( $\times 10^9/L$ ; normal range: 125–350)         | 219 (158–294)      | 213 (155–293)                     | 226 (162–302)                         | 231 (175–290)     | 226 (161–310)                     | 231 (177–285)                         | 0.905   |
| LDH (U/L; normal range: 109.0–240.0)                        | 234 (189–317)      | 237 (194–317)                     | 233 (181–317)                         | 205 (177–258)     | 209 (181–251)                     | 205 (176–261)                         | 0.959   |
| ALT (U/L; normal range: 5.0–35.0)                           | 32 (21–52)         | 32 (20–49)                        | 32 (22–59)                            | 31 (20–52)        | 29 (17–46)                        | 32 (20–55)                            | 0.169   |
| SCr ( $\mu\text{mol/L}$ ; normal range: 41.0–81.0)          | 66.3 (55.2–79.9)   | 65.5 (54.8–82.7)                  | 66.3 (55.5–78.1)                      | 64.5 (54.6–77.0)  | 62.2 (53.4–77.9)                  | 65.4 (55.1–76.9)                      | 0.244   |
| BUN (mmol/L; normal range: 2.9–8.2)                         | 5.16 (3.69–8.49)   | 5.16 (3.50–8.91)                  | 5.16 (3.80–7.75)                      | 5.22 (3.74–8.68)  | 5.17 (3.57–12.15)                 | 5.22 (3.80–8.35)                      | 0.893   |
| CRP (mg/L; normal range: 0.0–8.0)                           | 18.41 (3.37–57.35) | 22.00 (4.00–60.00)                | 17.00 (3.00–54.50)                    | 6.92 (2.24–31.98) | 7.00 (3.00–29.00)                 | 7.00 (2.00–32.00)                     | 0.648   |
| D-dimer $\geq 1$ ( $\mu\text{g/L}$ ; normal range: 0.0–0.5) | 136 (34%)          | 70 (35%)                          | 66 (33%)                              | 97 (27.2%)        | 35 (29.4%)                        | 62 (26.1%)                            | 0.501   |

(Continued to the next page)

| Characteristics                | 1:1 matched   |                                   |                                       | 1:2 matched   |                                   |                                       | P value |
|--------------------------------|---------------|-----------------------------------|---------------------------------------|---------------|-----------------------------------|---------------------------------------|---------|
|                                | Total (n=400) | Corticosteroids treatment (n=200) | Non-corticosteroids treatment (n=200) | Total (n=357) | Corticosteroids treatment (n=119) | Non-corticosteroids treatment (n=238) |         |
| <b>Comorbidity</b>             |               |                                   |                                       |               |                                   |                                       |         |
| Hypertension                   | 131 (32.3%)   | 65 (32.5%)                        | 66 (33%)                              | 119 (33.3%)   | 45 (37.8%)                        | 74 (31.1%)                            | 0.204   |
| Diabetes                       | 48 (12%)      | 22 (11%)                          | 26 (13%)                              | 53 (14.8%)    | 16 (13.4%)                        | 37 (15.5%)                            | 0.599   |
| CHD                            | 32 (8%)       | 13 (6.5%)                         | 19 (9.5%)                             | 35 (9.8%)     | 9 (7.6%)                          | 26 (10.9%)                            | 0.314   |
| CPD                            | 25 (6.3%)     | 15 (7.5%)                         | 10 (5%)                               | 22 (6.2%)     | 9 (7.6%)                          | 13 (5.5%)                             | 0.436   |
| Malignant tumor                | 22 (5.5%)     | 10 (5%)                           | 12 (6%)                               | 18 (5.0%)     | 4 (3.4%)                          | 14 (5.9%)                             | 0.305   |
| <b>Disease severity status</b> |               |                                   |                                       |               |                                   |                                       |         |
| Mild/General                   | 283 (70.8%)   | 142 (71%)                         | 141 (70.5%)                           | 315 (88.2%)   | 109 (91.6%)                       | 206 (86.6%)                           | 0.163   |
| Severe/Critical                | 117 (29.3%)   | 58 (29%)                          | 59 (29.5%)                            | 42 (11.8%)    | 10 (8.4%)                         | 32 (13.4%)                            |         |
| <b>Treatment</b>               |               |                                   |                                       |               |                                   |                                       |         |
| MV                             | 23 (5.8%)     | 12 (6%)                           | 11 (5.5%)                             | 2 (0.6%)      | 0 (0)                             | 2 (0.8%)                              | 0.554   |
| Ig therapy                     | 63 (15.8%)    | 32 (16%)                          | 31 (15.5%)                            | 22 (6.2%)     | 6 (5.0%)                          | 16 (6.7%)                             | 0.534   |
| Antibacterial therapy          | 347 (86.8%)   | 172 (86%)                         | 175 (87.5%)                           | 279 (78.2%)   | 94 (79.0%)                        | 185 (77.7%)                           | 0.786   |
| Antiflezzing therapy           | 113 (28.3%)   | 56 (28%)                          | 57 (28.5%)                            | 69 (19.3%)    | 20 (16.8%)                        | 49 (20.6%)                            | 0.394   |

Data are median (IQR) or *n* (%). *P* values were calculated by Mann-Whitney *U* test, Fisher's exact test or chi-square test, as appropriate. COVID-19: coronavirus disease 2019; NLR: neutrophil to lymphocyte ratio; LDH: lactate dehydrogenase; ALT: alanine aminotransferase; SCr: serum creatinine; BUN: blood urea nitrogen; CRP: C-reactive protein; CHD: chronic heart disease; CPD: chronic pulmonary disease; MV: mechanical ventilation. Ig: immunoglobulin. All the above patients' lung imaging was bilateral infiltration and antiviral treatment was given.

**Table S2 Characteristics of the patients in corticosteroids treatment and non-corticosteroids treatment groups before propensity score match in 232 severe/critical patients with COVID-19**

| Characteristics                                             | Total<br>(n=232)    | Corticosteroid s<br>treatment (n=134) | Non-corticosteroids<br>Treatment (n=98) | P value |
|-------------------------------------------------------------|---------------------|---------------------------------------|-----------------------------------------|---------|
| Age, years                                                  | 64 (53–71)          | 64 (53–71)                            | 64 (54–70)                              | 0.703   |
| Sex                                                         |                     | 0.010*                                |                                         |         |
| Female                                                      | 89 (38.4%)          | 42 (31.3%)                            | 47 (48.0%)                              |         |
| Male                                                        | 143 (61.6%)         | 92 (68.7%)                            | 51 (52.0%)                              |         |
| Symptoms on admission                                       |                     |                                       |                                         |         |
| Cough                                                       | 163 (70.2%)         | 95 (70.9%)                            | 68 (69.4%)                              | 0.804   |
| Sputum                                                      | 76 (32.8%)          | 52 (38.8%)                            | 24 (24.5%)                              | 0.022*  |
| Dyspnea                                                     | 95 (40.9%)          | 65 (48.5%)                            | 30 (30.6%)                              | 0.006*  |
| Fatigue                                                     | 127 (54.7%)         | 72 (53.7%)                            | 55 (56.1%)                              | 0.718   |
| Fever                                                       | 187 (80.6%)         | 112 (83.6%)                           | 75 (76.5%)                              | 0.180   |
| Laboratory findings                                         |                     |                                       |                                         |         |
| NLR                                                         | 5.98 (3.21–10.80)   | 7.26 (3.87–13.37)                     | 4.40 (2.79–8.41)                        | 0.000*  |
| Platelet ( $\times 10^9/L$ ; normal range: 125–350)         | 199 (141–278)       | 186 (126–247)                         | 228 (158–314)                           | 0.001*  |
| LDH (U/L; normal range: 109.0–245.0)                        | 318 (231–431)       | 363 (284–513)                         | 249 (193–342)                           | 0.000*  |
| ALT (U/L; normal range: 5.0–35.0)                           | 35 (22–55)          | 37 (22–57)                            | 34 (22–54)                              | 0.653   |
| SCr ( $\mu\text{mol/L}$ ; normal range: 41.0–81.0)          | 68.1 (58.4–82.0)    | 72.6 (60.1–84.9)                      | 65.1 (55.5–76.8)                        | 0.005*  |
| BUN (mmol/L; normal range: 2.9–8.2)                         | 5.45 (3.79–8.23)    | 5.47 (3.78–8.14)                      | 5.13 (3.78–8.38)                        | 0.919   |
| CRP (mg/L; normal range: 0.0–8.0)                           | 43.10 (11.82–84.71) | 59.14 (21.88–89.79)                   | 26.52 (5.14–70.07)                      | 0.000*  |
| D-dimer $\geq 1$ ( $\mu\text{g/L}$ ; normal range: 0.0–0.5) | 118 (50.9%)         | 70 (52.2%)                            | 48 (49.0%)                              | 0.624   |
| Comorbidity                                                 |                     |                                       |                                         |         |
| Hypertension                                                | 93 (40.1%)          | 49 (36.6%)                            | 44 (44.9%)                              | 0.201   |
| Diabetes                                                    | 35 (15.1%)          | 14 (10.4%)                            | 21 (21.4%)                              | 0.021*  |
| CHD                                                         | 25 (10.8%)          | 13 (9.7%)                             | 12 (12.2%)                              | 0.537   |
| CPD                                                         | 18 (7.8%)           | 13 (9.7%)                             | 5 (5.1%)                                | 0.196   |
| Malignant tumor                                             | 10 (4.3%)           | 5 (3.7%)                              | 5 (5.1%)                                | 0.857   |
| Treatment                                                   |                     |                                       |                                         |         |
| MV                                                          | 62 (26.7%)          | 50 (37.3%)                            | 12 (12.2%)                              | 0.000*  |
| Ig therapy                                                  | 92 (39.7%)          | 72 (53.7%)                            | 20 (20.4%)                              | 0.000*  |
| Antibacterial therapy                                       | 201 (86.6%)         | 129 (96.3%)                           | 72 (73.5%)                              | 0.000*  |
| Antiflezzing therapy                                        | 126 (54.3%)         | 85 (63.4%)                            | 41 (41.8%)                              | 0.001*  |
| Outcomes                                                    |                     |                                       |                                         |         |
| In-hospital mortality                                       | 29 (12.5%)          | 24 (17.9%)                            | 5 (5.1%)                                | 0.004*  |
| 28-day mortality                                            | 15 (6.5%)           | 10 (7.5%)                             | 5 (5.1%)                                | 0.470   |
| Duration of viral shedding after COVID-19 onset, days       | 24 (17–32)          | 24 (18–31)                            | 25 (16–34)                              | 0.908   |

Data are median (IQR) or  $n$  (%).  $P$  values were calculated by Mann-Whitney  $U$  test or chi-square test, as appropriate. COVID-19: coronavirus disease 2019; NLR: neutrophil to lymphocyte ratio; LDH: lactate dehydrogenase; ALT: alanine aminotransferase; SCr: serum creatinine; BUN: blood urea nitrogen; CRP: C-reactive protein; CHD: chronic heart disease; CPD: chronic pulmonary disease; MV: mechanical ventilation; Ig: immunoglobulin. All the above patients' lung imaging was bilateral infiltration and antiviral treatment was given. \* $P < 0.05$

**Table S3 Characteristics of the patients in corticosteroids treatment and non-corticosteroids treatment groups before propensity score match in 734 mild/general patients with COVID-19**

| Characteristics                                             | Total<br>(n=734)    | Corticosteroids<br>treatment (n=155) | Non-corticosteroids<br>Treatment (n=579) | P value |
|-------------------------------------------------------------|---------------------|--------------------------------------|------------------------------------------|---------|
| Age, years                                                  | 58 (48–66)          | 59 (46–68)                           | 58 (48–66)                               | 0.805   |
| Sex                                                         |                     | 0.236                                |                                          |         |
| Female                                                      | 381 (51.9%)         | 87 (56.1%)                           | 294 (50.8)                               |         |
| Male                                                        | 353 (48.1%)         | 68 (43.9%)                           | 285 (49.2%)                              |         |
| Symptoms on admission                                       |                     |                                      |                                          |         |
| Cough                                                       | 464 (63.2%)         | 104 (67.1%)                          | 360 (62.2%)                              | 0.259   |
| Sputum                                                      | 196 (26.7%)         | 43 (27.7%)                           | 153 (26.4%)                              | 0.742   |
| Dyspnoea                                                    | 247 (33.7%)         | 54 (34.8%)                           | 193 (33.3%)                              | 0.725   |
| Fatigue                                                     | 334 (45.5%)         | 73 (47.1%)                           | 261 (45.1%)                              | 0.654   |
| Fever                                                       | 568 (77.4%)         | 131 (17.8%)                          | 437 (75.5%)                              | 0.017*  |
| Laboratory findings                                         |                     |                                      |                                          |         |
| NLR                                                         | 2.59 (1.72–4.04)    | 3.80 (2.49–5.63)                     | 2.35 (1.66–3.53)                         | 0.000*  |
| Platelet ( $\times 10^9/L$ ; normal range: 125–350)         | 224 (174–276)       | 216 (156–300)                        | 225 (177–273)                            | 0.441   |
| LDH (U/L; normal range: 109.0–245.0)                        | 195 (163–249)       | 226 (190–295)                        | 189 (161–235)                            | 0.000*  |
| ALT (U/L; normal range: 5.0–35.0)                           | 31 (20–53)          | 31 (20–48)                           | 31 (20–55)                               | 0.309   |
| SCr ( $\mu\text{mol/L}$ ; normal range: 41.0–81.0)          | 65.25 (54.88–79.10) | 63.1 (53.4–82.6)                     | 65.8 (55.2–78.5)                         | 0.524   |
| BUN (mmol/L; normal range: 2.9–8.2)                         | 5.31 (3.99–8.96)    | 5.31 (3.48–11.88)                    | 5.31 (4.10–8.53)                         | 0.329   |
| CRP (mg/L; normal range: 0.0–8.0)                           | 4.33 (1.36–21.22)   | 13.90 (3.36–53.57)                   | 3.90 (0.99–14.77)                        | 0.060   |
| D-dimer $\geq 1$ ( $\mu\text{g/L}$ ; normal range: 0.0–0.5) | 167 (22.8%)         | 50 (32.3%)                           | 117 (20.2%)                              | 0.001   |
| Comorbidity                                                 |                     |                                      |                                          |         |
| Hypertension                                                | 212 (28.9%)         | 51 (32.9%)                           | 161 (27.8%)                              | 0.214   |
| Diabetes                                                    | 105 (14.3%)         | 18 (11.6%)                           | 87 (15.0%)                               | 0.281   |
| CHD                                                         | 73 (9.9%)           | 9 (5.8%)                             | 64 (11.1%)                               | 0.053   |
| CPD                                                         | 39 (5.3%)           | 9 (5.8%)                             | 30 (5.2%)                                | 0.758   |
| Malignant tumor                                             | 37 (5.0%)           | 7 (4.5%)                             | 30 (5.2%)                                | 0.737   |
| Treatment                                                   |                     |                                      |                                          |         |
| Ig therapy                                                  | 47 (6.4%)           | 20 (12.9%)                           | 27 (4.7%)                                | 0.000*  |
| Antibiotic therapy                                          | 439 (59.8%)         | 131 (84.5%)                          | 308 (53.2%)                              | 0.000*  |
| Antiflezzing therapy                                        | 122 (16.6%)         | 34 (21.9%)                           | 88 (15.2%)                               | 0.045*  |
| Outcomes                                                    |                     |                                      |                                          |         |
| Duration of viral shedding after COVID-19 onset, days       | 29 (21–36)          | 25 (18–34)                           | 30 (22–37)                               | 0.000*  |

Data are median (IQR) or  $n$  (%).  $P$  values were calculated by Mann-Whitney  $U$  test or chi-square test, as appropriate. COVID-19: coronavirus disease 2019; NLR: neutrophil to lymphocyte ratio; LDH: lactate dehydrogenase; ALT: alanine aminotransferase; SCr: serum creatinine; BUN: blood urea nitrogen; CRP: reactive protein; CHD: chronic heart disease; CPD: chronic pulmonary disease; Ig: immunoglobulin. All the above patients' lung imaging was bilateral infiltration and antiviral treatment was given. \* $P < 0.05$

**Table S4 Characteristics of 96 severe/critical patients with COVID-19 after propensity score match (1:1 matched) in corticosteroids treatment and non-corticosteroids treatment groups**

| Characteristics                                             | Total (n=96)        | Corticosteroids treatment (n=48) | Non-corticosteroids treatment (n=48) | P value |
|-------------------------------------------------------------|---------------------|----------------------------------|--------------------------------------|---------|
| Age, years                                                  | 65 (55–72)          | 66 (55–71)                       | 65 (53–72)                           | 0.806   |
| Sex                                                         |                     | 0.837                            |                                      |         |
| Female                                                      | 43 (44.8%)          | 21 (43.8%)                       | 22 (45.8%)                           |         |
| Male                                                        | 53 (55.2%)          | 27 (56.3%)                       | 26 (54.2%)                           |         |
| <b>Symptoms on admission</b>                                |                     |                                  |                                      |         |
| Cough                                                       | 72 (75%)            | 36 (75%)                         | 36 (75%)                             | 1.000   |
| Sputum                                                      | 35 (36.5%)          | 22 (45.8%)                       | 13 (27.1%)                           | 0.056   |
| Dyspnea                                                     | 37 (38.5%)          | 22 (45.8%)                       | 15 (31.2%)                           | 0.142   |
| Fatigue                                                     | 51 (53.1%)          | 24 (50.0%)                       | 27 (56.3%)                           | 0.539   |
| Fever                                                       | 78 (81.2%)          | 40 (83.3%)                       | 38 (79.2%)                           | 0.601   |
| <b>Laboratory findings</b>                                  |                     |                                  |                                      |         |
| NLR                                                         | 5.86 (3.65–11.45)   | 6.52 (3.85–12.51)                | 5.16 (3.57–11.38)                    | 0.433   |
| Platelet ( $\times 10^9/L$ ; normal range: 125–350)         | 205 (145–300)       | 197 (135–271)                    | 205 (153–321)                        | 0.446   |
| LDH (U/L; normal range: 109.0–245.0)                        | 306 (223–392)       | 315 (229–400)                    | 289 (202–377)                        | 0.238   |
| ALT (U/L; normal range: 5.0–35.0)                           | 34 (23–59)          | 36 (22–60)                       | 33 (24–55)                           | 0.657   |
| SCr ( $\mu\text{mol/L}$ ; normal range 41.0–81.0)           | 65.7 (55.7–76.9)    | 66.6 (57.3–81.9)                 | 64.55 (53.03–73.63)                  | 0.167   |
| BUN (mmol/L; normal range: 2.9–8.2)                         | 5.04 (3.99–7.49)    | 4.66 (3.61–7.57)                 | 5.11 (4.07–7.49)                     | 0.385   |
| CRP (mg/L; normal range: 0.0–8.0)                           | 44.27 (13.36–88.32) | 64.39 (12.30–88.32)              | 37.23 (13.95–88.94)                  | 0.803   |
| D-dimer $\geq 1$ ( $\mu\text{g/L}$ ; normal range: 0.0–0.5) | 55 (57.3%)          | 27 (56.3%)                       | 28 (58.3%)                           | 0.837   |
| <b>Comorbidity</b>                                          |                     |                                  |                                      |         |
| Hypertension                                                | 41 (42.7%)          | 17 (35.4%)                       | 24 (50%)                             | 0.149   |
| Diabetes                                                    | 12 (12.5%)          | 3 (6.3%)                         | 9 (18.8%)                            | 0.064   |
| CHD                                                         | 9 (9.4%)            | 3 (6.3%)                         | 6 (12.5%)                            | 0.486   |
| CPD                                                         | 8 (8.3%)            | 4 (8.3%)                         | 4 (8.3%)                             | 1.000   |
| Malignant tumor                                             | 6 (6.3%)            | 2 (4.2%)                         | 4 (8.3%)                             | 0.677   |
| <b>Treatment</b>                                            |                     |                                  |                                      |         |
| MV                                                          | 23 (24.0%)          | 12 (25.0%)                       | 11 (22.9%)                           | 0.811   |
| Ig therapy                                                  | 37 (38.5%)          | 17 (35.4%)                       | 20 (41.7%)                           | 0.529   |
| Antibacterial therapy                                       | 92 (95.8%)          | 46 (95.8%)                       | 46 (95.8%)                           | 1.000   |
| Antiflezzing therapy                                        | 55 (57.3%)          | 31 (64.6%)                       | 24 (50.0%)                           | 0.149   |

Data are median (IQR) or *n* (%). *P* values were calculated by Mann-Whitney *U* test, Fisher's exact test or chi-square test, as appropriate. COVID-19: coronavirus disease 2019; NLR: neutrophil to lymphocyte ratio; LDH: lactate dehydrogenase; ALT: alanine aminotransferase; SCr: serum creatinine; BUN: blood urea nitrogen; CRP: C-reactive protein; CHD: chronic heart disease; CPD: chronic pulmonary disease; MV: mechanical ventilation; Ig: immunoglobulin. All the above patients' lung imaging was bilateral infiltration and antiviral treatment was given.

**Table S5 Characteristics of 280 general/mild patients with COVID-19 after propensity score match (1:1 matched and 1:2 matched) in corticosteroids treatment and non-corticosteroids treatment groups**

| Characteristics                                             | 1:1 matched       |                                         |                                             | 1:2 matched       |                                        |                                                 |         |
|-------------------------------------------------------------|-------------------|-----------------------------------------|---------------------------------------------|-------------------|----------------------------------------|-------------------------------------------------|---------|
|                                                             | Total<br>(n=262)  | Corticosteroids<br>treatment<br>(n=131) | Non-corticosteroids<br>Treatment<br>(n=131) | Total<br>(n=288)  | Corticosteroids<br>treatment<br>(n=96) | Non-<br>corticosteroids<br>treatment<br>(n=192) | P value |
| Age, years                                                  | 58 (46–67)        | 57 (45–66)                              | 59 (49–69)                                  | 58 (47–66)        | 57 (45–66)                             | 58 (49–67)                                      | 0.372   |
| Sex                                                         |                   |                                         |                                             |                   |                                        |                                                 | 0.211   |
| Female                                                      | 138 (52.7%)       | 74 (56.5%)                              | 64 (48.9%)                                  | 150 (52.1%)       | 55 (57.3%)                             | 95 (49.5%)                                      |         |
| Male                                                        | 124 (47.3%)       | 57 (43.5%)                              | 67 (51.1%)                                  | 138 (47.9%)       | 41 (42.7%)                             | 97 (50.5%)                                      |         |
| <b>Symptoms on admission</b>                                |                   |                                         |                                             |                   |                                        |                                                 |         |
| Cough                                                       | 188 (71.8%)       | 90 (68.7%)                              | 98 (74.8%)                                  | 202 (70.1%)       | 68 (70.8%)                             | 134 (69.8%)                                     | 0.856   |
| Sputum                                                      | 82 (31.3%)        | 41 (31.3%)                              | 41 (31.3%)                                  | 81 (28.1%)        | 22 (22.9%)                             | 59 (30.7%)                                      | 0.164   |
| Dyspnea                                                     | 96 (36.6%)        | 47 (35.9%)                              | 49 (37.4%)                                  | 98 (34.0%)        | 32 (33.3%)                             | 66 (34.4%)                                      | 0.860   |
| Fatigue                                                     | 123 (46.9%)       | 62 (47.3%)                              | 61 (46.6%)                                  | 140 (48.6%)       | 50 (52.1%)                             | 90 (46.9%)                                      | 0.404   |
| Fever                                                       | 210 (80.2%)       | 111 (84.7%)                             | 99 (75.6%)                                  | 228 (79.2%)       | 81 (84.4%)                             | 147 (76.6%)                                     | 0.124   |
| <b>Laboratory findings</b>                                  |                   |                                         |                                             |                   |                                        |                                                 |         |
| NLR                                                         | 3.24 (2.23–4.62)  | 3.37 (2.30–4.99)                        | 3.04 (2.15–4.45)                            | 2.74 (1.99–3.80)  | 2.98 (2.05–4.36)                       | 2.63 (1.96–3.68)                                | 0.169   |
| Platelet ( $\times 10^9/L$ ; normal range: 125–350)         | 220 (164–287)     | 213 (156–294)                           | 225 (177–285)                               | 224 (168–279)     | 200 (156–267)                          | 231 (176–283)                                   | 0.095   |
| LDH (U/L; normal range: 109.0–245.0)                        | 218 (182–283)     | 211 (187–276)                           | 222 (178–297)                               | 202 (176–253)     | 201 (177–240)                          | 205 (176–265)                                   | 0.351   |
| ALT (U/L; normal range: 5.0–35.0)                           | 31 (21–49)        | 29 (19–46)                              | 32 (22–56)                                  | 31 (19–52)        | 27 (16–46)                             | 31 (20–57)                                      | 0.053   |
| SCr ( $\mu\text{mol/L}$ ; normal range: 41.0–81.0)          | 64.0 (54.0–78.9)  | 62.0 (53.4–79.8)                        | 68.1 (54.4–77.5)                            | 63.6 (54.1–77.9)  | 61.5 (53.5–78.7)                       | 65.5 (54.4–77.0)                                | 0.352   |
| BUN (mmol/L; normal range: 2.9–8.2)                         | 5.15 (3.65–8.84)  | 5.17 (3.47–130.60)                      | 5.13 (3.84–7.40)                            | 5.07 (3.67–8.56)  | 4.83 (3.50–64.19)                      | 5.09 (3.77–8.16)                                | 0.757   |
| CRP (mg/L; normal Range: 0.0–8.0)                           | 8.57 (2.97–35.58) | 8.53 (2.85–34.12)                       | 8.60 (3.01–37.38)                           | 5.00 (1.25–24.00) | 6.00 (2.25–28.00)                      | 5.00 (1.00–23.75)                               | 0.562   |
| D-dimer $\geq 1$ ( $\mu\text{g/L}$ ; normal range: 0.0–0.5) | 72 (27.5%)        | 39 (29.8%)                              | 33 (25.2%)                                  | 67 (23.3%)        | 26 (27.1%)                             | 41 (21.4%)                                      | 0.278   |

(Continued to the next page)

(Continued from the last page)

| Characteristics       | 1:1 matched      |                                         |                                             | 1:2 matched      |                                        |                                                 | P value |
|-----------------------|------------------|-----------------------------------------|---------------------------------------------|------------------|----------------------------------------|-------------------------------------------------|---------|
|                       | Total<br>(n=262) | Corticosteroids<br>treatment<br>(n=131) | Non-corticosteroids<br>Treatment<br>(n=131) | Total<br>(n=288) | Corticosteroids<br>treatment<br>(n=96) | Non-<br>corticosteroids<br>treatment<br>(n=192) |         |
| <b>Comorbidity</b>    |                  |                                         |                                             |                  |                                        |                                                 |         |
| Hypertension          | 79 (30.2%)       | 44 (33.6%)                              | 35 (26.7%)                                  | 81 (28.1%)       | 28 (29.2%)                             | 53 (27.6%)                                      | 0.781   |
| Diabetes              | 36 (13.7%)       | 13 (9.9%)                               | 23 (17.6%)                                  | 39 (13.5%)       | 10 (10.4%)                             | 29 (15.1%)                                      | 0.273   |
| CHD                   | 17 (6.5%)        | 6 (4.6%)                                | 11 (8.4%)                                   | 30 (10.4%)       | 10 (10.4%)                             | 20 (10.4%)                                      | 1.000   |
| CPD                   | 17 (6.5%)        | 9 (6.9%)                                | 8 (6.1%)                                    | 15 (5.2%)        | 4 (4.2%)                               | 11 (5.7%)                                       | 0.574   |
| Malignant tumor       | 11 (4.2%)        | 6 (4.6%)                                | 5 (3.8%)                                    | 13 (4.5%)        | 5 (5.2%)                               | 8 (4.2%)                                        | 0.920   |
| <b>Treatment</b>      |                  |                                         |                                             |                  |                                        |                                                 |         |
| Ig therapy            | 20 (7.6%)        | 10 (7.6%)                               | 10 (7.6%)                                   | 14 (4.9%)        | 4 (4.2%)                               | 10 (5.2%)                                       | 0.923   |
| Antibacterial therapy | 217 (82.8%)      | 108 (82.4%)                             | 109 (83.2%)                                 | 225 (78.1%)      | 75 (78.1%)                             | 150 (78.1%)                                     | 1.000   |
| Antiflezzing therapy  | 47 (17.9%)       | 24 (18.3%)                              | 23 (17.6%)                                  | 44 (15.3%)       | 13 (13.5%)                             | 31 (16.1%)                                      | 0.563   |

Data are median (IQR) or n (%). P values were calculated by Mann-Whitney U test, Fisher's exact test or chi-square test, as appropriate. COVID-19: coronavirus disease 2019; NLR: neutrophil to lymphocyte ratio; LDH: lactate dehydrogenase; ALT: alanine aminotransferase; SCr: serum creatinine; BUN: blood urea nitrogen; CRP: C-reactive protein; CHD: chronic heart disease; CPD: chronic pulmonary disease; Ig: immunoglobulin. All the above patients' lung imaging was bilateral infiltration and antiviral treatment was given.
